# Supplementary material for: Responses of the Necrotrophic Fungus Alternaria brassisicola to the Indolic Phytoalexin Brassinin
Source: Front Plant Sci. 2021 Jan 14;11:611643. doi: 10.3389/fpls.2020.611643 (PMC7860980; doi:10.3389/fpls.2020.611643)
Supplement: Supplementary Table 2 — Expression levels of genes (randomly selected from the microarray data) after brassinin exposure and estimated by quantitative PCR. Primer sets are indicated. [file Table_2.XLSX]

## Sheet: Feuil1
			Microarray results						Quantitative PCR results
Sequence ID	Predicted protein	Brassinin 0.5 h		Brassinin 2 h		Brassinin 6 h			Brassinin 0.5 h	Brassinin 2 h	Brassinin 6 h
		Log2 Ratio	P-val	Log2 Ratio	P-val	Log2 Ratio	P-val		Log2 Ratio	Log2 Ratio	Log2 Ratio
AB00101.1	peptide methionine sulfoxide	0.34	0.266176	0.94	0.00258171	0.36	0.387012		0.0285692	1.01436	2.38957
AB01114.1	Glycoside hydrolase family 16	1.22	0.000331773	1.39	0.000573911	0.55	0.500888		1.25701	2.57773	1.76553
AB01209.1	glutathione S-transferase	0.3	0.0672222	1.13	0.00341991	0.3	0.392594		1.38957	2.48543	2.29278
AB01686.1	Lanosterol 14-alpha-demethylase / cytochrome P450 ERG11	-0.08	0.510671	2.15	0.00555424	0.3	0.604936		0.0908534	3.1375	2.04614
AB01795.1	Zn-dependent hydrolase/oxidoreductase FMP30 / proposed to be involved in N-acylethanolamine metabolism	2.16	0.000143817	1.96	0.00271954	0.49	0.498478		4.62352	6.04876	2.57289
AB01836.1	Long chain fatty acyl-CoA synthetase FAA4	0.93	0.000472387	0.76	0.0485466	0.47	0.185857		1.06488	2.81762	0.899176
AB04481.1	Thioredoxin	0.83	0.0086859	1.09	0.0121055	0.22	0.720534		0.761285	1.29278	1.86592
AB04898.1	FabD/lysophospholipase-like protein PLB1	1.75	0.00141723	1.94	5.49265e-05	0.91	0.163086		4.44162	3.83693	1.60407
AB05243.1	glutathione S-transferase like protein	0.89	0.00134983	2.35	0.000420994	0.36	0.651003		2.926	7.66427	0.695994
AB05285.1	inositolphosphorylceramide-B C-26 hydroxylase SCS7	0.99	0.00280074	1.11	0.0194144	0.73	0.153116		1.38957	2.53356	1.79077
AB05715.1	cytochrome P450 ERG5	1.46	0.000291656	1.68	0.000330805	0.77	0.199121		4.80632	2.7301	1.15056
