# Supplementary material for: Responses of the Necrotrophic Fungus Alternaria brassisicola to the Indolic Phytoalexin Brassinin
Source: Front Plant Sci. 2021 Jan 14;11:611643. doi: 10.3389/fpls.2020.611643 (PMC7860980; doi:10.3389/fpls.2020.611643)
Supplement: Supplementary Table 3 — Genes induced by brassinin treatment and predicted to be involved in lipid metabolism. The indicated gene names correspond to homologous genes from the Saccharomyces cerevisiae genome except when indicated. [file Table_3.XLSX]

## Sheet: Feuil1
Sequence ID	Predicted protein	Brassinin 0.5 h		Brassinin 2 h		Brassinin 6 h
		Log2 Ratio	P-val	Log2 Ratio	P-val	Log2 Ratio	P-val
ERGOSTEROL METABOLISM
AB00415.1	C-8 sterol isomerase ERG2	0.95	0.00493877	0.38	0.0641534	-0.16	0.68967
AB05715.1	cytochrome P450 ERG5	1.46	0.000291656	1.68	0.000330805	0.77	0.199121
AB04740.1	acetyl-CoA acetyltransferase ERG10	0.51	0.0399612	0.92	0.00943605	0.07	0.741566
AB01686.1	Lanosterol 14-alpha-demethylase / cytochrome P450 ERG11	-0.08	0.510671	2.15	0.00555424	0.3	0.604936
AB09840.1	cytochrome P450 alkane hydroxylase ERG11	0.53	0.0134391	1.09	0.00195429	0.12	0.756638
AB07286.1	cytochrome P450	-0.09	0.448374	1.44	0.00713966	-0.33	0.293273
AB07954.1	Mevalonate kinase ERG12	-0.1	0.577687	0.93	0.00206222	0.55	0.109205
AB08569.1	NADP-cytochrome P450 reductase NPC1	0.66	0.00816451	0.58	0.027071	0.26	0.258638
AB08770.1	Cytochrome P450	2.19	0.000397235	1.4	0.000379331	0.03	0.968231
AB03054.1	NADH-cytochrome b5 reductase 3 MCR1	1.27	0.00478826	2.13	0.000194728	0.4	0.567883
AB03867.1	3-oxo-5-alpha-steroid 4-dehydrogenase	1.09	0.00241084	0.38	0.152377	0.1	0.660787
AB06495.1	Cytochrome b5 CYB5	1.21	0.00108912	2.42	0.000258479	0.38	0.636838
AB02735.1	oxysterol binding protein KES1	0.84	0.0030294	0.48	0.034709	0.21	0.251591
AB04981.1	OSH3	1.08	0.000417342	0.57	0.127497	0.47	0.309516
AB07599.1	sterol regulatory element-binding protein cleavage-activating protein	0.79	0.00756534	1.05	0.00188465	0.16	0.394769
AB07373.1	ABC transporter CDR3	1.87	0.00105121	2.02	0.0351698	0.64	0.598168
AB01405.1	ABC transporter	1.89	0.00098244	1.81	0.00131032	0.51	0.637219
AB02435.1	steroid transport PDR5	1.81	0.000633949	0.75	0.00769327	0.74	0.267119
AB04925.1	ABC transporter	1.77	2.88693e-05	1.34	0.00560945	0.48	0.593712
AB06022.1	C-14 sterol reductase	0.09	0.682316	-0.23	0.368234	0.83	0.00802832
SPHINGOLIPID METABOLISM
AB01804.1	sphinganine hydroxylase SUR2	0.5	0.00665066	0.11	0.56028	0.5	0.117996
AB05285.1	inositolphosphorylceramide-B C-26 hydroxylase SCS7	0.99	0.00280074	1.11	0.0194144	0.73	0.153116
AB00504.1	Component of inositol phosphorylceramide (IPC) synthase KEI1	0.93	0.00221404	0.8	0.00847829	0.67	0.0898656
AB07127.1	Neutral/alkaline nonlysosomal ceramidase	0.67	0.0491284	1.72	0.000402487	0.05	0.926206
AB07303.1	Dihydrosphingosine phosphate lyase DPL1	0.63	0.00238681	1.07	0.00066357	0.03	0.903062
AB10310.1	sphingoid long chain base kinase LCB5	1.1	0.000333599	0.97	0.00488668	0.1	0.769131
AB08320.1	Phosphatidylinositol:ceramide phosphoinositol transferase AUR1	0.73	0.0101805	0.71	0.00681993	0.48	0.230377
FATTY ACID METABOLISM
AB01482.1	3-hydroxyacyl-CoA dehydrogenase and enoyl-CoA hydratase FOX2	0.88	0.0150296	1.74	0.000791837	0.14	0.815214
AB06235.1	3-hydroxybutyrate dehydrogenase type 2	1.07	0.00307378	0.01	0.964709	0.53	0.24786
AB02249.1	gluconate 5-dehydrogenase	0.12	0.317603	1.13	0.000997069	0.13	0.703985
AB03002.1	Peroxisomal nudix pyrophosphatase	0.63	0.00642125	2.22	0.000623717	-0.2	0.756602
AB05650.1	3-ketoacyl-CoA thiolase 1	0.33	0.140788	0.73	0.00992988	-0.09	0.633766
AB04987.1	3-ketoacyl-CoA thiolase B	0.56	0.00987494	1.06	0.00400735	0.06	0.792628
AB05431.1	Peroxisomal acyl-CoA thioesterase TES1	0.12	0.285684	0.97	0.00435654	0.24	0.195324
AB05242.1	putative polyketide synthase protein	2.21	0.00429555	3.16	0.00643735	0.38	0.809298
AB06201.1	similar to acyl-CoA dehydrogenase	-0.73	0.00646615	0.86	0.00457318	0.12	0.495662
AB06284.1	Mitochondrial beta-keto-acyl synthase with possible role in fatty acid synthesis	0.86	0.0046457	-0.04	0.881572	0.5	0.169071
AB08823.1	long-chain fatty acid transport protein 1	0.79	0.00184317	0.88	0.00155409	-0.02	0.943105
AB07463.1	long-chain fatty acid transporter	-0.13	0.507469	1.12	0.00820503	-0.26	0.324524
AB09700.1	Peroxisomal 2.4-dienoyl-CoA reductase; auxiliary enzyme of fatty acid beta-oxidation SPS19	0.1	0.408923	1.84	9.41121e-05	0.04	0.863101
AB08412.1	putative d-arabinitol dehydrogenase protein	0.68	0.00142253	0.43	0.0997315	0.65	0.114041
AB01836.1	Long chain fatty acyl-CoA synthetase FAA4	0.93	0.000472387	0.76	0.0485466	0.47	0.185857
AB01833.1	Delta(9) fatty acid desaturase	-0.54	0.297413	0.07	0.727163	1.2	0.00133798
PHOSPHOLIPID METABOLISM
AB01989.1	phosphatidylglycerol/phosphatidylinositol transfer protein precursor NPC2	0.7	0.00462396	0.9	0.00298708	0.34	0.371041
AB09993.1	Phosphatidylinositol-4-phosphate 5-kinase core	0.92	0.0155068	1.51	0.000419279	0.09	0.778758
AB07799.1	1-acyl-sn-glycerol-3-phosphate acyltransferase 2 CST26	1	0.00451345	1.08	0.00252286	0.6	0.0633521
AB00675.1	Inositol polyphosphate multikinase / arginine metabolism regulation protein III ARG82	0.57	0.00411077	0.16	0.464974	0.02	0.960093
AB04136.1	glycoside hydrolase family 36 protein	1.1	0.000367436	0.18	0.367135	0.62	0.3166
AB02097.1	phosphatidylinositol transfer protein CSR1	1.13	0.00454247	0.8	0.0221143	-0.21	0.593929
AB01874.1	Phosphatidylinositol/phosphatidylcholine transfer protein SEC14	1.65	0.000361825	1.56	0.0139891	0.84	0.19947
AB05730.1	similar to phospholipase PldA	2.11	0.000119107	0.66	0.0182417	0.07	0.900552
AB04898.1	FabD/lysophospholipase-like protein PLB1	1.75	0.00141723	1.94	5.49265e-05	0.91	0.163086
AB01522.1	Choline/ethanolamine transporter HNM1	0.64	0.0606048	1.07	0.00790557	-0.54	0.652321
AB01795.1	Zn-dependent hydrolase/oxidoreductase FMP30	2.16	0.000143817	1.96	0.00271954	0.49	0.498478
AB05696.1	ethanolamine utilization protein eutT	0.52	0.207283	1.06	0.000774735	-0.17	0.616418
AB05598.1	phosphatidate cytidylyltransferase CDS1	1.05	0.000212277	0.41	0.0886361	0.24	0.325705
AB02007.1	Phosphatidylserine synthase CHO1	1.57	0.000112811	0.51	0.229887	0.44	0.47657
AB03035.1	Lipoprotein-associated phospholipase A2	1.7	0.000867848	0.94	0.00421058	0.26	0.411884
AB03808.1	Integral ER membrane protein SCS2	0.88	0.000468673	0.43	0.0500978	0.21	0.560304
AB04912.1	Diacylglycerol kinase DGK1	1.8	0.000281674	1.74	0.000148444	0.82	0.328404
AB08942.1	Lysophospholipase YJU3	1.98	0.00134356	2.39	0.00230832	0.57	0.577274
AB04982.1	Lipase GDSL	0.77	0.0138642	1.46	0.00135414	0.4	0.526008
AB05495.1	Endosomal protein that interacts with phospholipid flippase DRS2	1.08	0.0328717	1.03	0.00428565	0.11	0.846052
AB06075.1	Putative aminophospholipid translocase NEO1	0.72	0.00616351	1.06	0.00117182	0.4	0.244418
AB06612.1	Aminophospholipid translocase DRS2	0.08	0.458258	0.96	0.00321058	0.01	0.96349
AB08309.1	tafazzin	0.39	0.0628793	0.84	0.0090003	0.01	0.97774
