# Supplementary material for: Responses of the Necrotrophic Fungus Alternaria brassisicola to the Indolic Phytoalexin Brassinin
Source: Front Plant Sci. 2021 Jan 14;11:611643. doi: 10.3389/fpls.2020.611643 (PMC7860980; doi:10.3389/fpls.2020.611643)
Supplement: Supplementary Table 4 — Genes induced by brassinin treatment and predicted to be involved in the oxidative stress response. The indicated gene names correspond to homologous genes from the Saccharomyces cerevisiae genome except when indicated. [file Table_4.XLSX]

## Sheet: Feuil1
Sequence ID	Predicted protein	Brassinin 0.5 h		Brassinin 2 h		Brassinin 6 h
		Log2 Ratio	P-val	Log2 Ratio	P-val	Log2 Ratio	P-val
AB00104.1	zinc-binding oxidoreductase ToxD	1.62	3.02082e-05	0.94	0.00404833	0.04	0.910709
AB00443.1	NADH-ubiquinone oxidoreductase 64 kDa subunit	0.72	0.00671477	0.44	0.24202	0.65	0.0239398
AB00768.1	FAD dependent oxidoreductase	0.2	0.286661	0.92	0.00155325	-0.04	0.938725
AB10572.1	Oxidoreductase FAD/NAD(P)-binding protein	0.67	0.02174	1.35	0.00033206	0.47	0.137663
AB03565.1	FAD/NAD(P)-binding domain-containing protein	1.95	0.00697693	1.65	0.00204798	0.62	0.530376
AB08854.1	FAD binding domain containing protein	1.27	0.00149025	1.45	0.0102784	0.2	0.631158
AB08980.1	FAD binding oxidoreductase	0.7	0.0132284	1.38	0.00466615	-0.29	0.316436
AB09457.1	GMC oxidoreductase	0.57	0.00445956	0.52	0.0266787	-0.11	0.778225
AB06188.1	GMC oxidoreductase	0.01	0.919427	1.11	0.00655654	-0.09	0.6549
AB09368.1	pyridine nucleotide-disulphide oxidoreductase	1.08	0.000572849	0.65	0.0202202	0.21	0.419016
AB08421.1	Pyridine nucleotide-disulfide oxidoreductase class-2	0.5	0.00847081	0.05	0.757781	0.33	0.143999
AB01795.1	Zn-dependent hydrolase/oxidoreductase	2.16	0.000143817	1.96	0.00271954	0.49	0.498478
AB02918.1	oxidoreductase, short chain dehydrogenase/reductase family	-0.17	0.281745	1.21	0.00284498	0.07	0.782584
AB09032.1	isoflavone reductase family protein CipA	1.33	0.00155843	2.2	0.00066209	0.52	0.473902
AB01239.1	glutathione-dependent formaldehyde-activating, GFA	0.68	0.00480066	0.13	0.513315	0.23	0.285765
AB04279.1	glutathione-dependent formaldehyde-activating	0.08	0.641028	0.85	0.00281569	-0.2	0.275358
AB04098.1	Glutathione S-transferase	0.74	0.00426847	-0.16	0.475984	-0.05	0.820788
AB06060.1	glutathione S-transferase	0.61	0.00215007	0.52	0.0684481	0.06	0.82511
AB09895.1	glutathione S-transferase II AbUre2pB1	0.13	0.298801	-0.12	0.634391	-0.29	0.120224
AB08641.1	glutathione S-transferase	1.87	0.00248056	3.32	2.2122e-06	0.72	0.490889
AB08663.1	glutation S-transferase AbMAPEG1	1.69	4.09078e-05	2.07	0.00514195	0.62	0.4627
AB03486.1	glutathione S-transferase C-terminal-like protein	0.3	0.226138	1.01	0.00280294	0.14	0.719481
AB05243.1	glutathione S-transferase like protein AbGTT1.2	0.89	0.00134983	2.35	0.000420994	0.36	0.651003
AB01209.1	glutathione S-transferase	0.3	0.0672222	1.13	0.00341991	0.3	0.392594
AB09794.1	Cytidylyltransferase	0.74	0.00248724	0.94	0.00823423	0.54	0.0851071
AB00335.1	aldo-keto reductase	0.17	0.345135	0.87	0.00605448	0.09	0.609028
AB02955.1	thioredoxin reductase	1	0.00287896	0.12	0.744349	0.16	0.314438
AB04826.1	peptide methionine sulfoxide reductase msrA/msrB	0.55	0.0723735	0.91	0.00363076	0.33	0.089577
AB04964.1	short-chain dehydrogese reductase family	0.1	0.641549	0.75	0.0050273	0.01	0.953661
AB08664.1	dihydrofolate reductase	0.31	0.0304918	1.15	0.00480334	-0.4	0.391152
AB08855.1	24-dehydrocholesterol reductase precursor	1.39	0.000104429	1.19	0.0228168	0.41	0.619613
AB04808.1	heme-thiolate peroxidase	0.49	0.161149	2.1	0.000205563	0.03	0.972747
AB09988.1	proline oxidase	-0.21	0.504338	1.7	0.000642669	-1.11	0.32863
AB09379.1	pyridoxamine 5-phosphate oxidase	0.4	0.29776	0.98	0.00244496	0.38	0.186076
AB02248.1	NADPH oxidase B	0.66	0.00327162	0.86	0.00263468	0.44	0.147364
AB10295.1	homogentisate 1,2-dioxygenase	0.22	0.130572	1.85	9.61608e-05	-0.03	0.913622
AB04360.1	Intradiol ring-cleavage dioxygenase	-0.13	0.250467	0.82	0.00280448	-0.19	0.238541
AB00826.1	indoleamine 2,3-dioxygenase alpha type	0.37	0.304257	1.84	0.00109698	0.76	0.436968
AB07497.1	Homogentisate 12-dioxygenase	-0.07	0.756318	1.12	0.00742136	-0.23	0.248941
AB08505.1	catechol dioxygenase	0.61	0.0143367	1.69	0.000159519	0.27	0.448168
AB08922.1	Carotenoid oxygenase	1.95	0.000882951	1.85	3.65787e-05	0.44	0.456327
AB01959.1	cyclohexanone 1,2-monooxygenase	0.55	0.0448395	0.8	0.00391253	0.16	0.489623
AB05072.1	monooxygenase, putative	0.79	0.00499561	0.64	0.0166837	0.11	0.449803
AB03470.1	FAD monooxygenase	0.14	0.572036	1.05	0.000691768	0.13	0.451038
AB08311.1	thioredoxin-like protein	0.18	0.448185	1.14	0.000520774	0.23	0.448957
AB09437.1	putative Thioredoxin	0.82	0.0235552	0.79	0.00319418	0.24	0.634824
AB04481.1	Thioredoxin	0.83	0.0086859	1.09	0.0121055	0.22	0.720534
AB10215.1	acyl-coenzyme A thioesterase 9	0.53	0.0717201	0.8	0.00292609	0.19	0.631476
AB00346.1	salicylaldehyde dehydrogese	1.44	0.000596235	1.74	0.0151149	0.51	0.646227
AB06495.1	short-chain specific acyl-CoA dehydrogenase, mitochondrial precursor	1.21	0.00108912	2.42	0.000258479	0.38	0.636838
AB00848.1	6-phosphogluconate dehydrogenase C-terminal	0.39	0.0381339	0.8	0.00601517	0.12	0.397091
AB04685.1	putative mn superoxide dismutase protein	0.25	0.20884	0.92	0.00754016	0.34	0.0930006
AB09821.1	Cu,Zn superoxide dismutase SOD1	0.23	0.100255	0.99	0.00417956	0.14	0.629765
AB00211.1	glutamate-cysteine ligase regulatory subunit	0.18	0.259561	1.78	0.000123313	-0.14	0.452925
AB00813.1	glutamate-cysteine ligase	1.29	0.000314918	1.55	0.000385708	0.06	0.841308
AB07221.1	glutamate decarboxylase	1.43	0.0091579	0.35	0.133985	0.63	0.182503
AB03158.1	ribulose-phosphate 3-epimerase	0.07	0.537973	0.64	0.00808045	0.11	0.490897
AB04202.1	putative nucleoside-diphosphate-sugar epimerase protein	0.17	0.181545	1.43	0.002336	0.33	0.623246
AB00101.1	peptide methionine sulfoxide	0.34	0.266176	0.94	0.00258171	0.36	0.387012
AB08543.1	cytochrome b561	1.01	0.0130672	0.73	0.00480016	0.09	0.76369
AB05860.1	mitochondrial hypoxia responsive domain containing protein	1.65	9.61474e-05	1.43	0.000328199	0.66	0.427918
AB00782.1	HR1 repeat rho-binding protein	0.87	0.00331571	1.69	0.00010621	0.69	0.452154
AB00893.1	calcium/calmodulin-dependent protein kinase	1.24	0.000944349	1.04	0.00985536	0.58	0.0320747
AB04817.1	AP-1-like protein	0.78	0.00423271	0.36	0.0724432	0.4	0.13596
AB02413.1	Peptidase S16 lon	1.29	0.00222524	0.67	0.0266331	0.25	0.563995
AB04598.1	flavohemoprotein	1.44	0.00524065	-0.89	0.0837818	0.12	0.57303
