# Supplementary material for: Responses of the Necrotrophic Fungus Alternaria brassisicola to the Indolic Phytoalexin Brassinin
Source: Front Plant Sci. 2021 Jan 14;11:611643. doi: 10.3389/fpls.2020.611643 (PMC7860980; doi:10.3389/fpls.2020.611643)
Supplement: Supplementary Table 6 — Genes induced by brassinin treatment and predicted to be involved in cell wall maintenance and biogenesis. The indicated gene names correspond to homologous genes from the Saccharomyces cerevisiae genome except when indicated. [file Table_6.XLSX]

## Sheet: Feuil1
Sequence ID	Predicted protein	Brassinin 0.5 h		Brassinin 2 h		Brassinin 6 h
		Log2 Ratio	P-val	Log2 Ratio	P-val	Log2 Ratio	P-val
AB00440.1	GPI-anchored cell surface glycoprotein	0.71	0.0244605	1.98	0.000257748	0.86	0.138576
AB00447.1	GPI-anchored cell surface glycoprotein	0.15	0.406467	1.1	0.00595684	0.27	0.608875
AB06063.1	GPI-anchored cell surface glycoprotein	0.11	0.558665	1.4	0.00726092	0.09	0.744822
AB06063.1	GPI-anchored cell surface glycoprotein	0.11	0.558665	1.4	0.00726092	0.09	0.744822
AB06497.1	GPI-anchored cell surface glycoprotein	0.31	0.0374801	1.2	0.00995637	0.19	0.627721
AB02634.1	GPI-anchored cell surface glycoprotein	0.23	0.109062	1.07	0.00415102	-1.06	0.276265
AB03017.1	GPI-anchored cell surface glycoprotein	0.84	0.0209922	2.33	0.000970634	0.93	0.281289
AB05360.1	GPI-anchored cell surface glycoprotein	0.1	0.541442	1.07	0.00332655	0.09	0.7037
AB08017.1	GPI-anchored cell surface glycoprotein	0.2	0.387912	0.96	0.00781123	-1.11	0.0517406
AB09858.1	GPI-anchored cell surface glycoprotein	0.92	0.0013604	-0.07	0.705492	0.43	0.0714913
AB04345.1	GPI anchored cell wall protein	0.29	0.0371283	-0.59	0.0200152	1.13	0.00257151
AB00881.1	Anchorage subunit of a-agglutinin of a-cells	-0.07	0.65618	0.93	0.00257034	0.13	0.537945
AB04358.1	Anchorage subunit of a-agglutinin of a-cells	0.65	0.0159388	1.61	0.00283103	0.23	0.742552
AB05540.1	Anchorage subunit of a-agglutinin of a-cells	1.94	9.15654e-05	0.42	0.0467587	0.8	0.20117
AB08792.1	Anchorage subunit of a-agglutinin of a-cells	0.52	0.00586009	0.29	0.436126	0.2	0.255462
AB08839.1	Anchorage subunit of a-agglutinin of a-cells	0.59	0.0340859	0.87	0.00549413	0.38	0.346571
AB05433.1	Cell wall mannoprotein	1.12	0.000427186	1.96	7.89015e-05	0.25	0.652648
AB08728.1	Cell wall mannoprotein	0.67	0.00300653	0.78	0.00701376	0.06	0.910115
AB01126.1	cell wall biogenesis protein Ecm15	0.33	0.0897262	0.65	0.00749045	-0.13	0.488507
AB03012.1	isochorismatase hydrolase	1.68	7.64323e-05	2.28	3.08444e-05	0.52	0.440128
AB00912.1	Beta-1,3-glucanosyltransferase	0.91	0.00479798	0.61	0.123246	0.93	0.0159868
AB03063.1	alpha-glucosidase	-0.13	0.374391	1.24	0.00389568	0.24	0.58323
AB09059.1	Glucosidase II catalytic subunit	0.17	0.178714	1.02	0.00135501	0.19	0.241781
AB05280.1	Cell wall protein with similarity to glucanases	0.6	0.00325711	0.33	0.36788	0.42	0.0823605
AB07082.1	beta-1,3-glucanase	0.83	0.006157	0.34	0.192136	0.05	0.789551
AB07341.1	Endo-beta-1,3-glucanase	1.26	0.000835905	1.37	0.00359049	0.96	0.193032
AB01114.1	Chitin transglycosylase	1.22	0.000331773	1.39	0.000573911	0.55	0.500888
AB01979.1	Chitin synthase II	0.77	0.000751171	0.5	0.100085	1.24	0.0495576
AB02267.1	chitinase 1 precursor	0.22	0.301597	2.4	9.96339e-05	-0.35	0.537336
AB02866.1	Activator of Chs3p (chitin synthase III)	0	0.963375	0.71	0.00529906	0.42	0.0661707
AB05905.1	Chitin synthase III,	-0.02	0.917065	0	0.994358	0.81	0.00515658
AB05911.1	Chitin synthase III,	-0.28	0.343498	-0.2	0.388255	1.09	0.00422264
AB07318.1	Chitin deacetylase	-0.01	0.981796	0.05	0.809348	0.72	0.00706624
AB03779.1	Chitin deacetylase	-0.02	0.848139	1.07	0.00163473	0.05	0.751386
AB03131.1	isotrichodermin C-15 hydroxylase	2.56	0.000297159	3.25	1.7514e-06	0.63	0.64562
AB02001.1	Partially redundant sensor-transducer of the CWI signaling pathway	0.03	0.910605	-0.28	0.175814	0.74	0.00665415
AB03704.1	GTPase rho1	0.3	0.0336825	0.9	0.00204496	0.34	0.24047
AB07135.1	MAP kinase SLT2	0.05	0.781943	1.24	0.00593486	0.17	0.491257
AB08308.1	glycosyltransferase family 32 protein	0.37	0.0270316	1.36	0.000186045	0.57	0.29571
AB08640.1	Putative mannosidase	1.68	6.28866e-05	0.9	0.0264007	0.63	0.412476
AB04904.1	GDP-mannose pyrophosphorylase	0.15	0.644475	-0.32	0.126602	0.87	0.00306942
AB09314.1	Xylitol dehydrogenase	0.38	0.0590596	1.55	0.00402863	0.34	0.519157
